# Supplementary material for: Direct biogas reforming to turquoise H2 and carbon material in a catalytic fluidised-bed reactor
Source: Royal Society of Chemistry journal article supplement (doi:10.1039/d4nj00846d), 2024-01-01
Supplement: d4nj00846d2.pdf [file d4nj00846d2.pdf]

*Electronic Supplementary Material*

**Direct biogas reforming to turquoise H<sub>2</sub> and carbon material in a catalytic fluidised-bed reactor**

Valentin L'hospital, Leandro Goulart de Araujo, Yves Schuurman, Nolven Guilhaume, David Farrusseng\*

IRCELYON, Institut de Recherches sur la Catalyse et l'Environnement de Lyon, UMR5256 CNRS-  
Université de Lyon, 69626 Villeurbanne, France

\*Corresponding author: david.farrusseng@ircelyon.univ-lyon1.fr

**Table S1:** Conditions of the experimental runs and equipment setup.

---

| <b>Equations for WHSV</b>                                                                                                                                                                                                                                                                                                                                                                                                               |                                   |
|-----------------------------------------------------------------------------------------------------------------------------------------------------------------------------------------------------------------------------------------------------------------------------------------------------------------------------------------------------------------------------------------------------------------------------------------|-----------------------------------|
| $WHSV (cm^3 g^{-1} h^{-1}) = \frac{\text{total mass flow of the reactants per time } (cm^3 h^{-1})}{\text{total mass of the catalyst } (g)}$                                                                                                                                                                                                                                                                                            |                                   |
| $Q_{TP} \left( \frac{cm^3}{min} \right) = Q_{STP} \frac{101.3kPa}{P} \frac{T}{273K}$                                                                                                                                                                                                                                                                                                                                                    |                                   |
| $\tau(s) = \frac{60(V_0 - V_{cat})}{Q_{TP}}$                                                                                                                                                                                                                                                                                                                                                                                            |                                   |
| <p>In this context, <math>V_0</math> represents the volume of the empty reactor (<math>cm^3</math>), <math>V_{cat}</math> stands for the overall catalyst volume in <math>cm^3</math>, and <math>Q_{TP}</math> denotes the total gas flow rate at the specific reforming temperature and pressure and <math>Q_{STP}</math> the total flow at 273K and 101.3kPa. <math>\tau</math> represents the residence times estimated at 950°C</p> |                                   |
| <b>Experimental conditions</b>                                                                                                                                                                                                                                                                                                                                                                                                          |                                   |
| Reaction system                                                                                                                                                                                                                                                                                                                                                                                                                         | Dry reforming of biogas           |
| System configuration                                                                                                                                                                                                                                                                                                                                                                                                                    | Catalytic fluidized bed operation |
| Pressure (kPa)                                                                                                                                                                                                                                                                                                                                                                                                                          | 101.325                           |
| Temperature (°C)                                                                                                                                                                                                                                                                                                                                                                                                                        | 750–950                           |
| Total gas flow rate ( $cm^3 min^{-1}$ ) at STP*                                                                                                                                                                                                                                                                                                                                                                                         | 300                               |
| Gas flow rate ratio                                                                                                                                                                                                                                                                                                                                                                                                                     | $CH_4/CO_2/N_2 = 2/1/1$           |
| Weight Hourly Space Velocity (WHSV, $cm^3 g^{-1} h^{-1}$ )                                                                                                                                                                                                                                                                                                                                                                              | 1637                              |
| Catalyst weight (g)                                                                                                                                                                                                                                                                                                                                                                                                                     | 11                                |
| Volume of void ( $cm^3$ ) = $V_0 - V_{cat}$                                                                                                                                                                                                                                                                                                                                                                                             | 89.1 = 101.8–12.7                 |
| $Q_{TP}$ ( $cm^3 min^{-1}$ )                                                                                                                                                                                                                                                                                                                                                                                                            | 1344                              |
| Residence time at 950 °C (s)                                                                                                                                                                                                                                                                                                                                                                                                            | 3.98                              |
| <i>Reynolds</i> number                                                                                                                                                                                                                                                                                                                                                                                                                  | <40 (laminar)                     |
| *Standard Temperature and Pressure                                                                                                                                                                                                                                                                                                                                                                                                      |                                   |
| <b>Electric furnace configuration</b>                                                                                                                                                                                                                                                                                                                                                                                                   |                                   |
| Frequency (Hz)                                                                                                                                                                                                                                                                                                                                                                                                                          | 50                                |
| Power (kVA)                                                                                                                                                                                                                                                                                                                                                                                                                             | 3.6                               |
| Current (A)                                                                                                                                                                                                                                                                                                                                                                                                                             | 16                                |
| <b>Summary of bed characteristics</b>                                                                                                                                                                                                                                                                                                                                                                                                   |                                   |
| Static bed height (cm)                                                                                                                                                                                                                                                                                                                                                                                                                  | 5                                 |
| Diameter (mm)                                                                                                                                                                                                                                                                                                                                                                                                                           | 16                                |
| Average bed mass (g)                                                                                                                                                                                                                                                                                                                                                                                                                    | 11                                |
| Bulk density ( $g cm^{-3}$ )                                                                                                                                                                                                                                                                                                                                                                                                            | 1.22                              |

---

**Table S2:** N<sub>2</sub> physisorption (77K) of the fresh and spent Fe/C catalyst after biogas reforming

| Materials           | SSA (m <sup>2</sup> g <sup>-1</sup> ) | V <sub>p</sub> (cm <sup>3</sup> g <sup>-1</sup> ) (p/p <sub>0</sub> =0.98) |
|---------------------|---------------------------------------|----------------------------------------------------------------------------|
| Fresh Fe/C catalyst | 2                                     | 6.8                                                                        |
| Spent Fe/C catalyst | 11                                    | 26.6                                                                       |

**Table S3:** H<sub>2</sub>O physisorption (293K) of the fresh and spent Fe/C catalyst (before and after biogas cracking)

| Materials           | Amount of adsorbed water (mg/g) at 20°C (p/p <sub>0</sub> =0.95) |
|---------------------|------------------------------------------------------------------|
| Fresh Fe/C catalyst | 0.7-1.7                                                          |
| Spent Fe/C catalyst | 3.0-6.0                                                          |

at 293K.

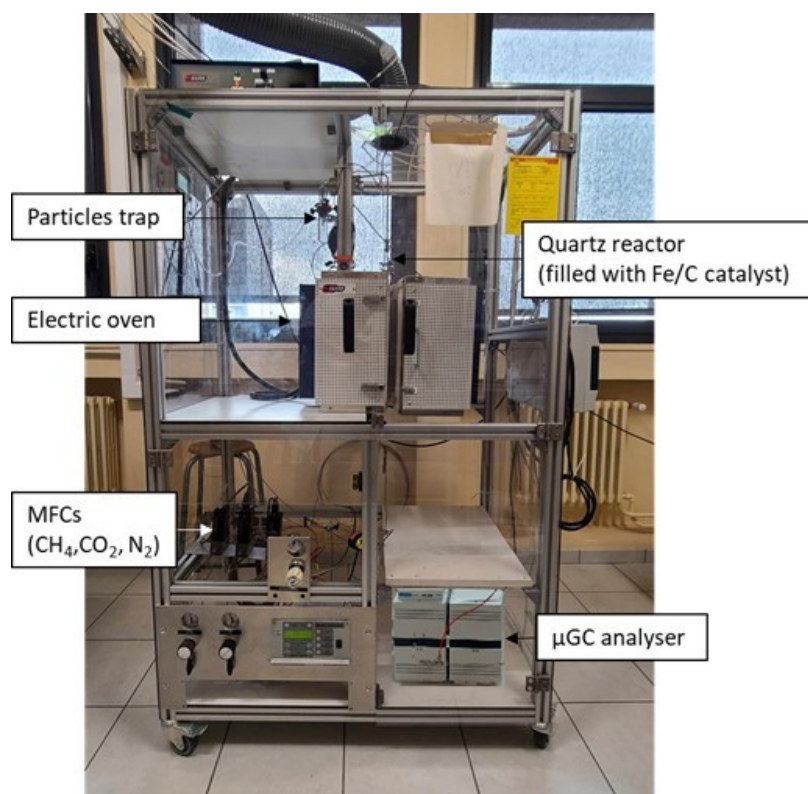

**Figure S1:** Scheme of the experimental set-up for biogas reforming.

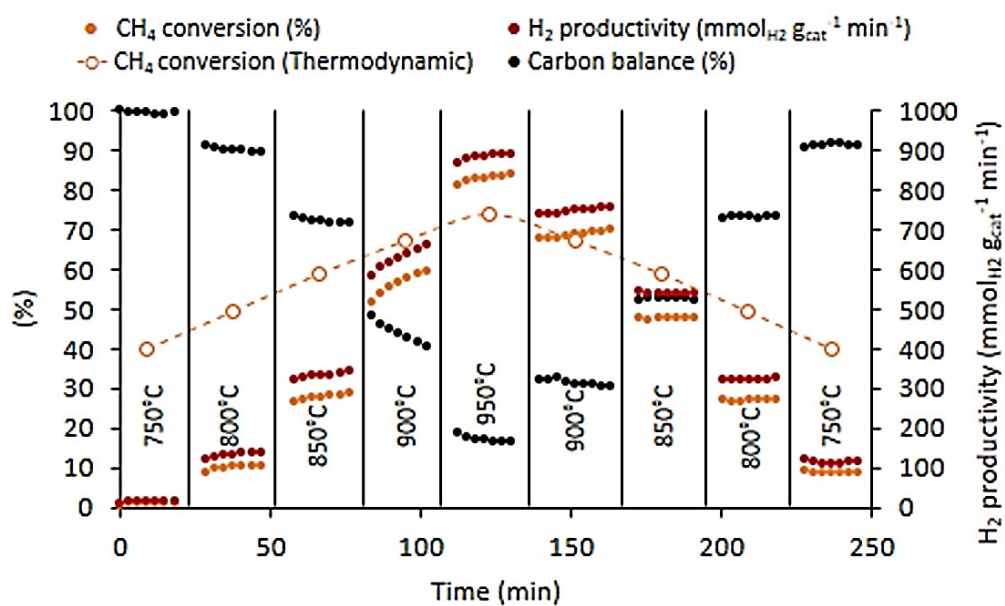

**Figure S2:** Methane conversion as function of the temperature, Carbon balance estimated from gas phase reactants and products. Inlet flow: CH<sub>4</sub>/N<sub>2</sub> 1/1, 300 mL min<sup>-1</sup>, 1 bar.

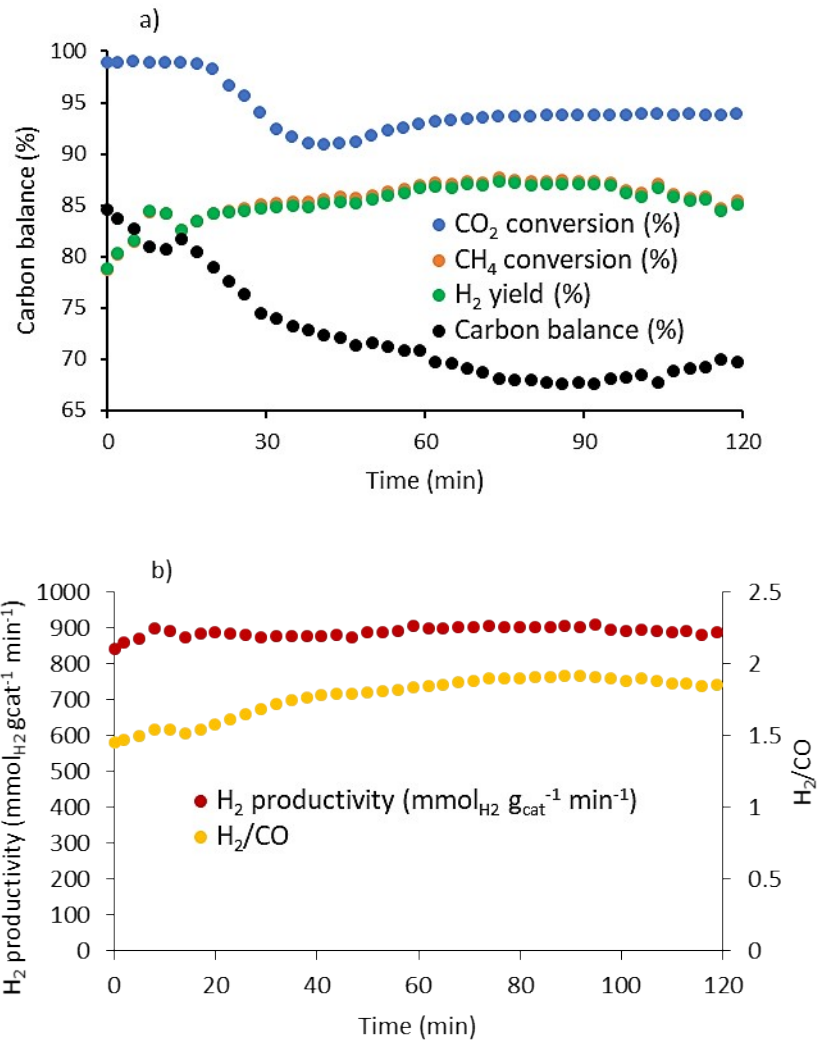

**Figure S3:** a) CH<sub>4</sub> and CO<sub>2</sub> conversion, H<sub>2</sub> yield and carbon balance (%) as function of time, Carbon balance estimated from gas phase reactants and products, b) H<sub>2</sub> productivity and H<sub>2</sub>/CO ratio as function of time for biogas reforming, T=950°C, 1 bar, CH<sub>4</sub>:CO<sub>2</sub>:N<sub>2</sub> 2:1:1, 300 mL min<sup>-1</sup>.

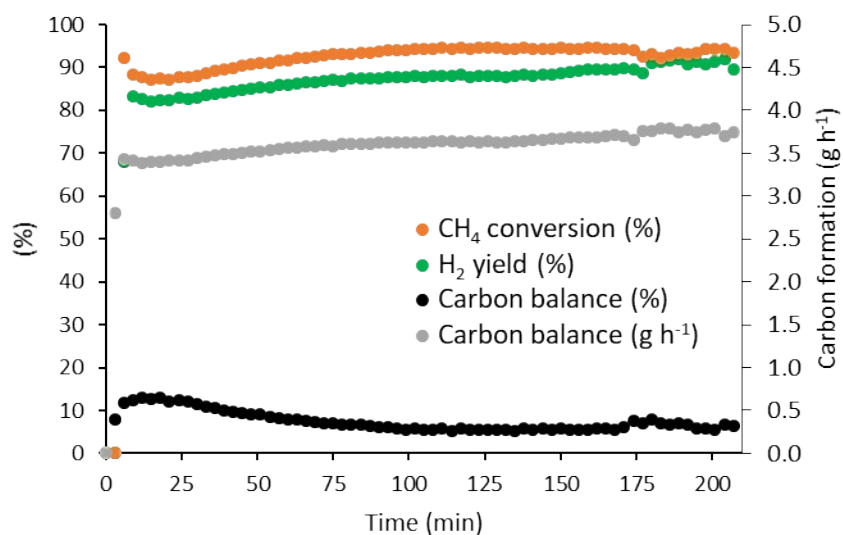

**Figure S4:** Methane conversion, H<sub>2</sub> yield, carbon balance (%) and carbon formation (g h<sup>-1</sup>) as function of time for methane cracking, T=950°C, 1 bar, CH<sub>4</sub>:N<sub>2</sub> (1:1), 300 mL min<sup>-1</sup>. Carbon balance estimated from gas phase reactants and products.



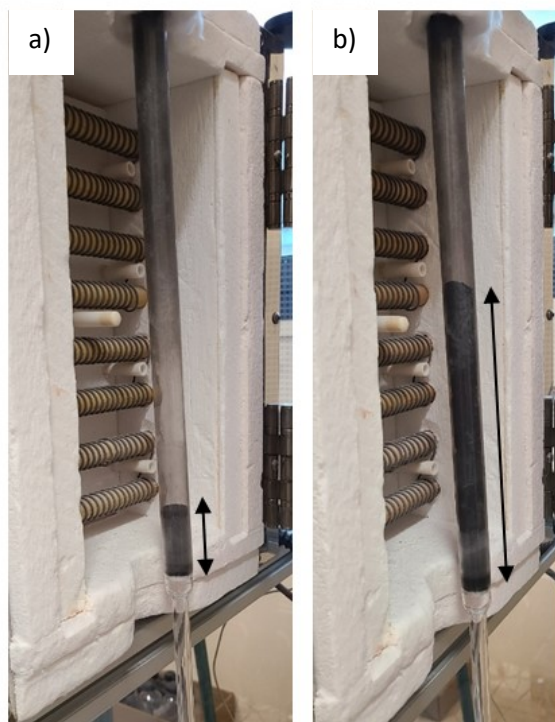

**Figure S5:** Quartz reactor filled with a) fresh and b) spent Fe/C catalyst. Black arrow is for catalyst bed height: 5 cm before cracking, 18 cm after biogas reforming,  $T=950^{\circ}\text{C}$ , 1 bar,  $\text{CH}_4:\text{CO}_2:\text{N}_2$  2:1:1,  $300\text{ mL min}^{-1}$ .

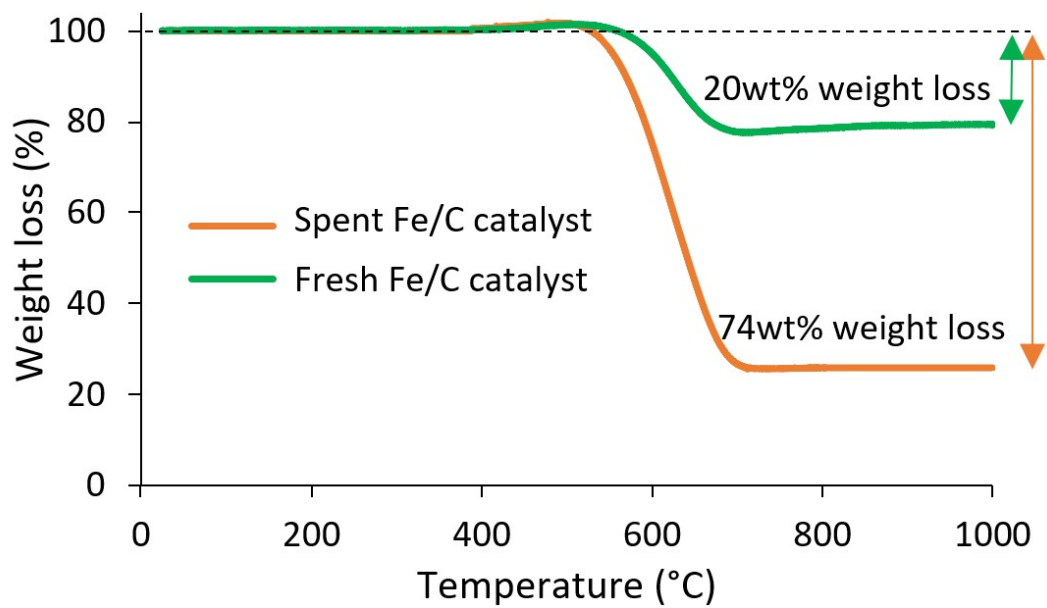

**Figure S6:** TGA of the fresh and spent Fe/C catalyst, under air, from 20 to 1000°C, heating rate 5°C min<sup>-1</sup>.

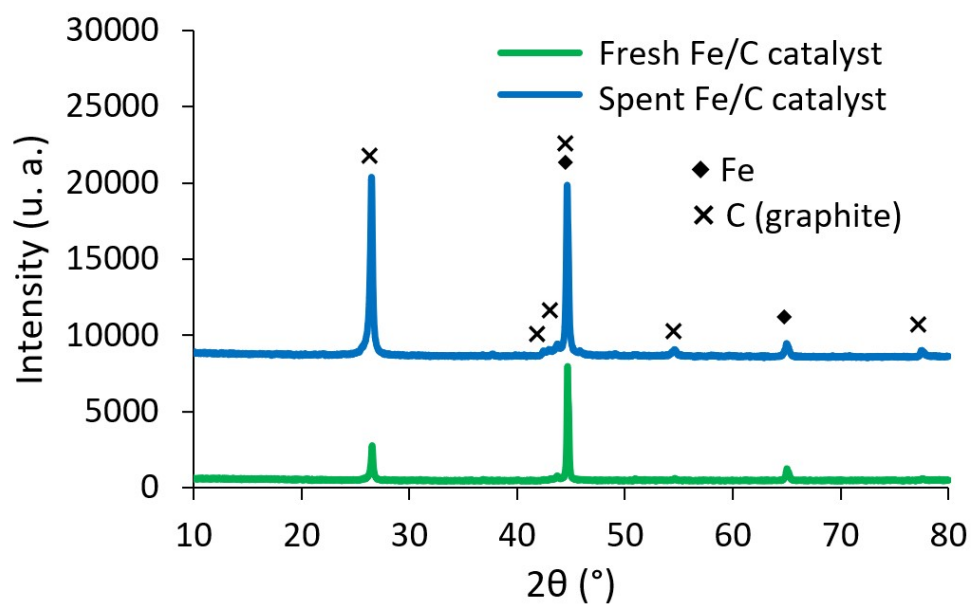

**Figure S7:** XRD analysis of the fresh and spent Fe/C catalyst after biogas reforming.

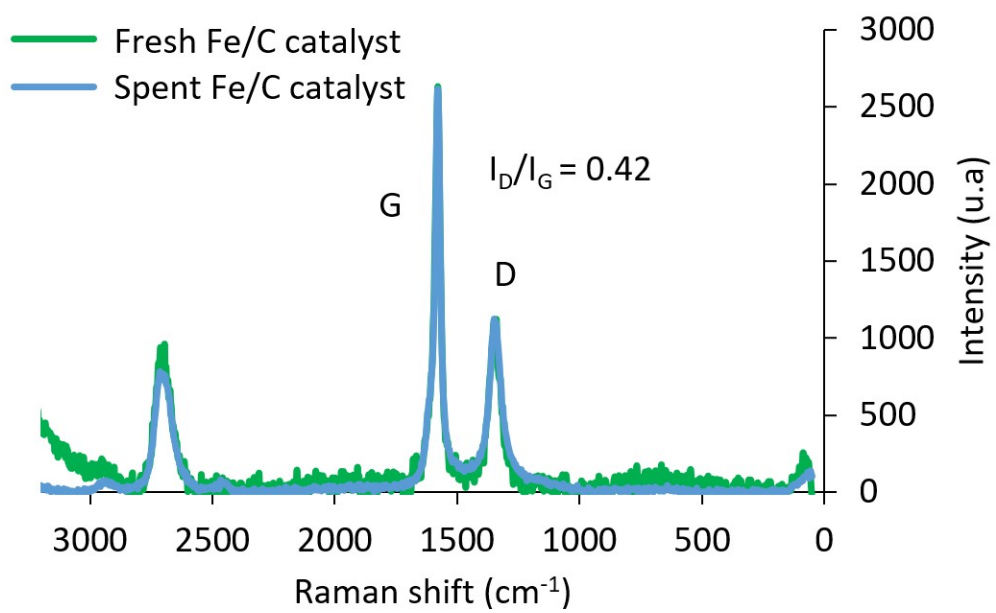

**Figure S8:** Raman spectroscopy of the fresh and spent Fe/C catalyst after biogas reforming.

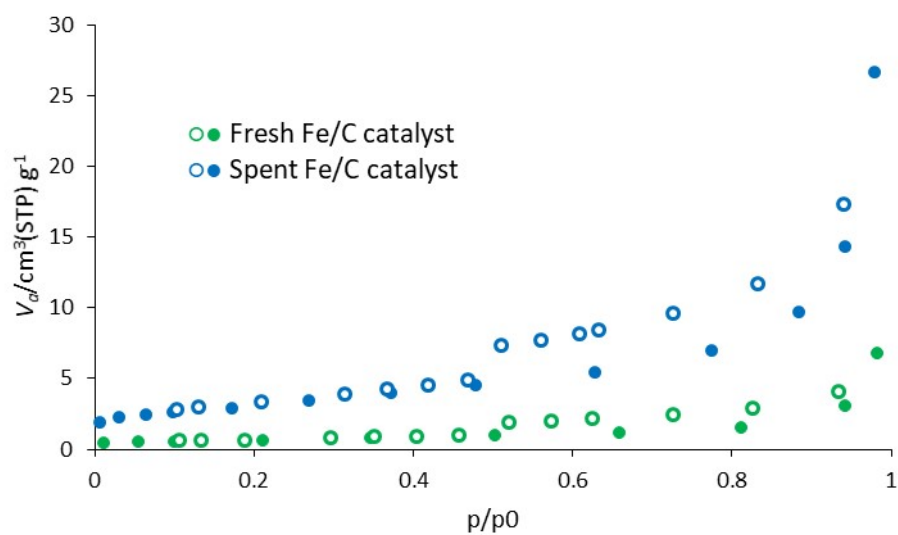

**Figure S9:** N<sub>2</sub> physisorption (77K) of the fresh and spent Fe/C catalyst (before and after biogas cracking).

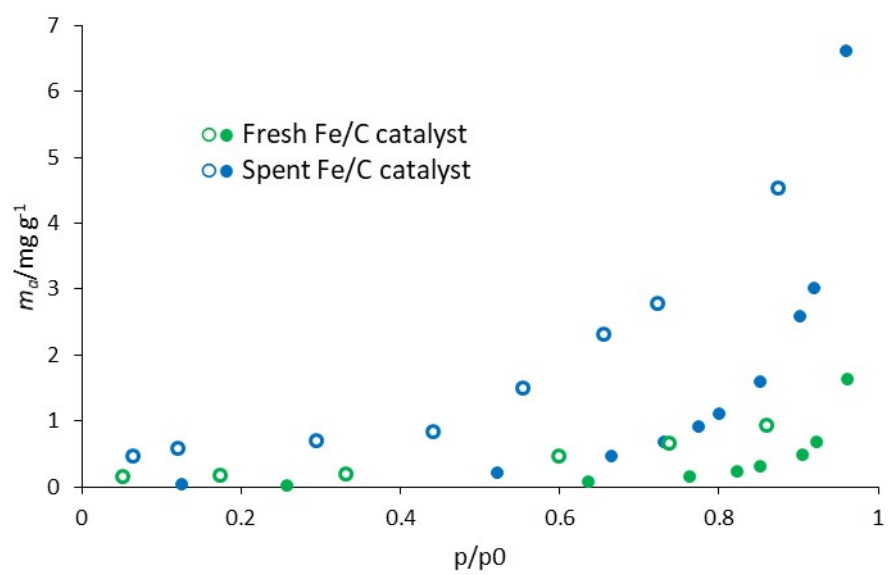

**Figure S10:** H<sub>2</sub>O physisorption (293K) of the fresh and spent Fe/C catalyst after biogas reforming.
